# Supplementary material for: Simultaneous analyses of photoinduced electron transfer in the wild type and four single substitution isomers of the FMN binding protein from Desulfovibrio vulgaris, Miyazaki F
Source: Royal Society of Chemistry journal article supplement (doi:10.1039/c0cp02634d), 2011-01-01
Supplement: c0cp02634d-a.pdf [file c0cp02634d-a.pdf]

## Supplemental Material A

### Mathematical basis for numerical calculation of fluorescence decay

Expression for a calculated fluorescence dynamics by MD was first given by Henry and Hochstrasser<sup>35</sup> as eq A1 (HH method).

$$F_{calc}(t) = \left\langle \exp \left\{ - \int_{t'}^{t'+t} [k_0 + k_{ET}(\tau)] d\tau \right\} \right\rangle_{AV} \quad (A1)$$

$k_0$  is deactivation rate without ET, and  $k_{ET}(\tau)$  ET rate given by eq 1 or eq 4 in text. Here we assume that  $k_0$  is much less than  $k_{ET}(\tau)$ , and so negligible compared to ET rate.  $\langle \dots \rangle_{AV}$  denotes an averaging procedure with respect to  $t'$ . Lower and upper limit of the integration in the original equation given by Henry and Hochstrasser, are 0 and  $t$ , but these should be  $t'$  and  $t' + t$  as in eq A1.

$$F_{calc}(t) = \left\langle \exp \left\{ - \Delta t \sum_{i=0}^n k_{ET}(j+i) \right\} \right\rangle_{AV} \quad (A2)$$

Figure A1 illustrates the method of numerical calculation for  $F_{calc}(t)$ . In eq A2  $\int_{t'}^{t'+t} k_{ET}(\tau) d\tau$  was approximated by a summation,  $\Delta t \sum_{i=0}^n k_{ET}(j+i)$ . More accurately, the integral may be numerically calculated by Simpson method. In eq A2  $\Delta t = t/m$  and  $k_{ET}(j+i)$  denotes ET rate at  $t = t_{j+i}$ . Numerically  $\langle \dots \rangle_{AV}$  is also calculated by a summation as follows:

$$F_{calc}(t) = \frac{1}{m-n} \sum_{j=0}^{m-n} \exp \left\{ - (t/m) \sum_{i=0}^n k_{ET}(j+i) \right\} \quad (A3)$$

$n$  is number of data points of fluorescence decay, which is assumed that  $m$  is much larger than  $n$ .

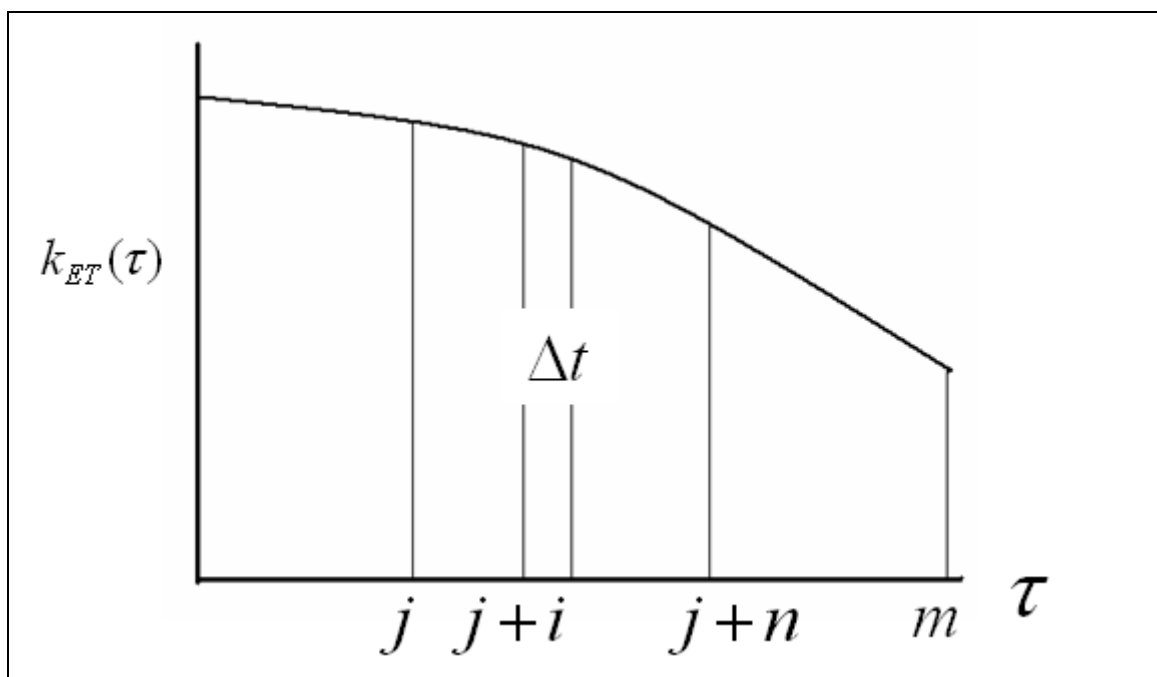

Figure A1 Numerical calculation of fluorescence decay with  $k_{ET}(\tau)$ . Time range of MD was divided into  $m$  intervals of  $\Delta t$ .  $\tau$  represents MD time. Fluorescence decay is to be calculated from  $t=t_j$  to  $t=t_{j+i}$ .  $\langle \dots \rangle_{AV}$  may be taken from  $t'=0$  to  $t'=t_n$  ( $m=2n$ )

From eq A3 we can see that  $k_{ET}(0)$  is used for the numerical calculation of fluorescence decay once,  $k_{ET}(1)$  twice,  $k_{ET}(2)$  three times, and  $k_{ET}(l)$  ( $l=i+j$ )  $l+1$  times, when  $l \leq n-1$ .  $k_{ET}(l)$  is used  $n+1$  times when  $n \leq l \leq m-n$ .  $k_{ET}(l)$  is used  $m-l+1$  times when  $l \geq m-n+1$ . This implies that  $k_{ET}(l)$  with  $n \leq l \leq m-n$  are most important upon the fluorescence decay, but  $k_{ET}(l)$  with  $l$  near 0 or  $m$  are not important. Namely, according to HH method, the values of  $k_{ET}(l)$  ( $0 \leq l \leq m$ ) are not equivalent for the calculation of fluorescence decay.

On the other hand our method is numerically calculated with eq A4.

$$F_{calc}(t) = \frac{1}{m-n} \sum_{j=0}^{m-n} \exp\{-k_{ET}(j)t\} \quad (\text{A4})$$

$t$  extends from 0 to  $n\Delta t$ . In Eq A4  $k_{ET}(j)$  ( $j=0$  to  $m$ ) is used only once. All values of  $k_{ET}(l)$  ( $n \leq l \leq m-n$ ) are used  $n+1$  times in the HH method, and 1 time in our method, so that after dividing  $F_{calc}(t)$  at every point of time by number of used frequency,

$F_{calc}(t)$  obtained by the both method should be same. Only the differences in  $F_{calc}(t)$  between the both method are time domain of MD average at  $l \leq n-1$  and at  $l \geq m-n+1$ . Accordingly, the both method should be equivalent, if  $m$  is much larger than  $n$ .

Calculation time of averaging procedure by HH method at each  $t$  may be

$$\begin{aligned} & 2\Delta t_c(1+2+3+\dots+n) + \Delta t_c(n+1)(m-2n+1) \\ & = \Delta t_c(n+1)(m-n+1) \end{aligned} ,$$

while the calculation time of our method is  $\Delta t_c m$  at each  $t$ .  $\Delta t_c$  denotes the calculation time of each step of the averaging procedure. Our method is much advantageous in the calculation time.
